# Supplementary material for: Psychological treatments for depression among women experiencing intimate partner violence: findings from a randomized controlled trial for behavioral activation in Goa, India
Source: Arch Womens Ment Health. 2019 Jul 30;22(6):779–89. doi: 10.1007/s00737-019-00992-2 (PMC6841649; doi:10.1007/s00737-019-00992-2)
Supplement: Supplementary file 1 — (DOCX 15 kb) [file 737_2019_992_MOESM1_ESM.docx]

Supplementary tables

Supplementary Table 1.

Correlation matrix of relevant variables for HAP, *r*2

|  | Baseline depressive symptoms | Age | 3-month depressive symptoms | 3-month PAAS | 12-month depressive symptoms | 12-month PAAS | 12-month IPV | 3-month IPV |
| --- | --- | --- | --- | --- | --- | --- | --- | --- |
| Baseline depressive symptoms | 1 | - | - | - | - | - | - | - |
| Age | 0.011 | 1 | - | - | - | - | - | - |
| 3-month depressive symptoms | 0.090 | -0.017 | 1 | - | - | - | - | - |
| 3-month PAAS | -0.054 | 0.090 | -.681** | 1 | - | - | - | - |
| 12-month depressive symptoms | 0.088 | 0.156 | .415** | -.450** | 1 | - | - | - |
| 12-month PAAS | 0.047 | -0.064 | -.302** | .530** | -.587** | 1 | - | - |
| 12-month IPV | 0.134 | -0.037 | .201* | -0.110 | .214* | -0.088 | 1 | - |
| 3-month IPV | -0.086 | -0.047 | 0.122 | -0.149 | 0.183 | -0.137 | .534** | 1 |

*Note.* Pearson correlation, *r*, was used to assess correlations. PAAS = Premium Abbreviated Activation Scale, used to assess activation levels. Women’s education, occupation, and religion were not significantly correlated with the outcome variable and are therefore not unreported in this table.

aBaseline depressive symptoms was not normally distributed; the distribution was significantly positively skewed (higher depressive symptoms). Therefore, baseline depressive symptoms were logarithmically transformed to reduce positive skew; neither transformed nor original scores yielded significant correlations with variables of interest.
**Significant at the 0.01 level (2-tailed). *Significant at the 0.05 level (2-tailed).

Supplementary Table 2.

Correlation matrix of relevant variables for EUC, *r*2

| |  | Baseline depressive symptoms | Age | 3-month depressive symptoms | 3-month PAAS | 12-month depressive symptoms | 12-month PAAS | 12-month IPV | 3-month IPV | | --- | --- | --- | --- | --- | --- | --- | --- | --- | | aBaseline depressive symptoms | 1 | - | - | - | - | - | - | - | | Age | 0.125 | 1 | - | - | - | - | - | - | | 3-month depressive symptoms | 0.088 | -0.013 | 1 | - | - | - | - | - | | 3-month PAAS | 0.001 | .289** | -.436** | 1 | - | - | - | - | | 12-month depressive symptoms | 0.092 | 0.122 | .464** | -0.146 | 1 | - | - | - | | 12-month PAAS | -0.160 | -0.051 | -.431** | .377** | -.600** | 1 | - | - | | 12-month IPV | -0.048 | -0.114 | .251** | -0.168 | .268** | -.271** | 1 | - | | 3-month IPV | 0.071 | -.214* | .277** | -0.130 | .194* | -.268** | .499** | 1 | | |
| --- | --- | --- | --- | --- | --- | --- | --- | --- | --- | --- | --- | --- | --- | --- | --- | --- | --- | --- | --- | --- | --- | --- | --- | --- | --- | --- | --- | --- | --- | --- | --- | --- | --- | --- | --- | --- | --- | --- | --- | --- | --- | --- | --- | --- | --- | --- | --- | --- | --- | --- | --- | --- | --- | --- | --- | --- | --- | --- | --- | --- | --- | --- | --- | --- | --- | --- | --- | --- | --- | --- | --- | --- | --- | --- | --- | --- | --- | --- | --- | --- | --- | --- |
| *Note.* Pearson correlation, *r*, was used to assess correlations. PAAS = Premium Abbreviated Activation Scale, used to assess activation levels. Women’s education, occupation, and religion were not significantly correlated with the outcome variable and are therefore not unreported in this table.  aBaseline depressive symptoms was not normally distributed; the distribution was significantly positively skewed (higher depressive symptoms). Therefore, baseline depressive symptoms were logarithmically transformed to reduce positive skew; neither transformed nor original scores yielded significant correlations with variables of interest. **Significant at the 0.01 level (2-tailed). *Significant at the 0.05 level (2-tailed). |
